# Supplementary material for: A Novel Curcumin-Mycophenolic Acid Conjugate Inhibited Hyperproliferation of Tumor Necrosis Factor-Alpha-Induced Human Keratinocyte Cells
Source: MDPI journal article supplement (doi:10.3390/pharmaceutics13070956), 2021-06-25
Supplement: s1 [file s1]

# Supplementary Materials: A Novel Curcumin-Mycophenolic Acid Conjugate Inhibited Hyperproliferation of Tumor Necrosis Factor-Alpha-Induced Human Keratinocyte Cells

Yonelian Yuyun, Pahweenvaj Ratnatilaka Na Bhuket, Wiwat Supasena, Piyapan Suwattananuruk, Kemika Praengam, Opa Vajragupta, Chawanphat Muangnoi and Pornchai Rojsitthisak

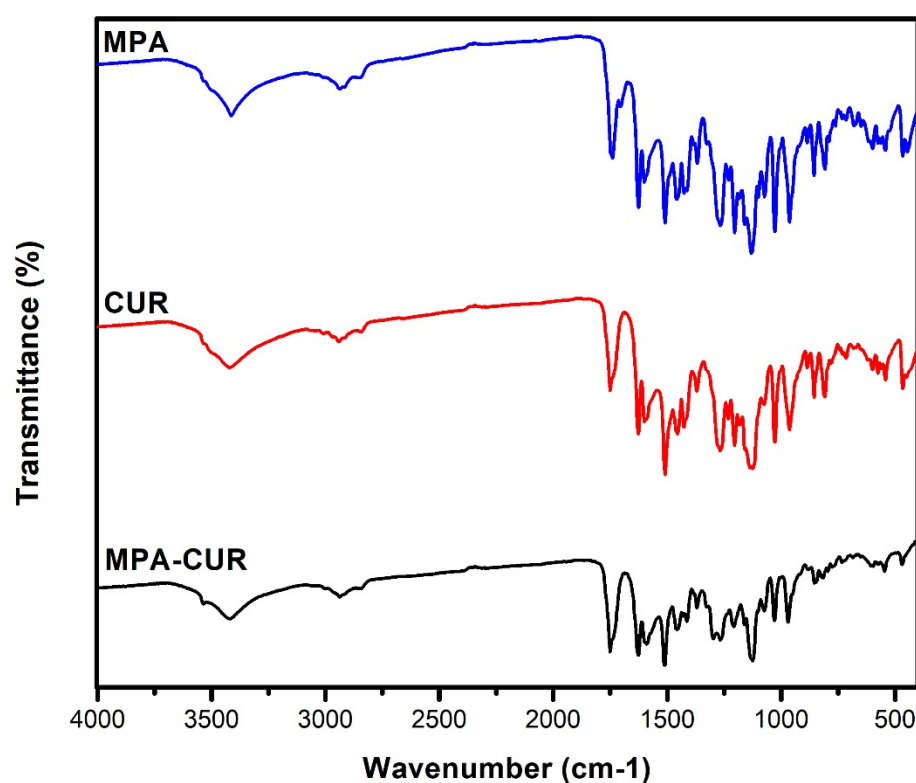

**Figure S1.** IR spectrum of MPA, CUR, and MPA-CUR conjugate.

## MPA

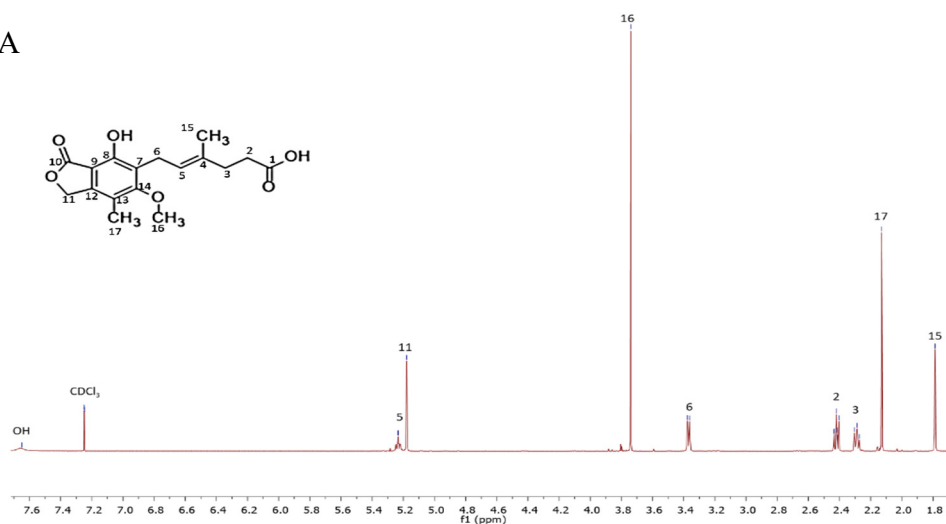

## MPA-CUR

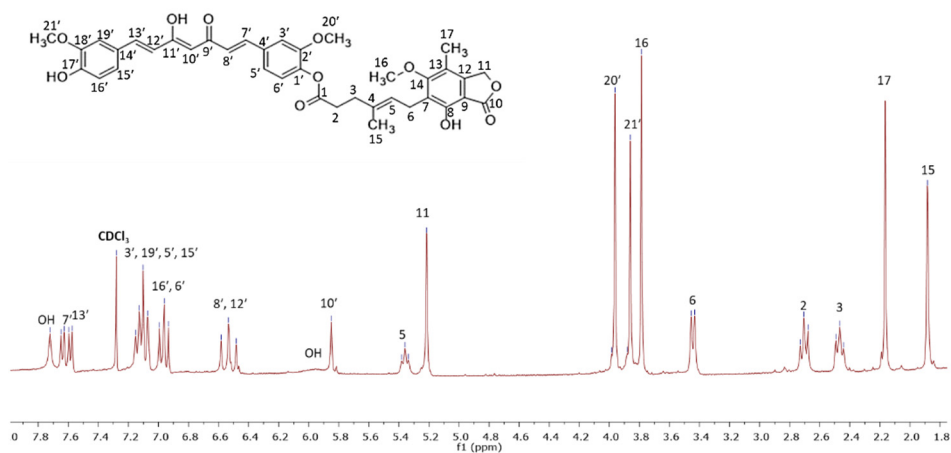

## CUR

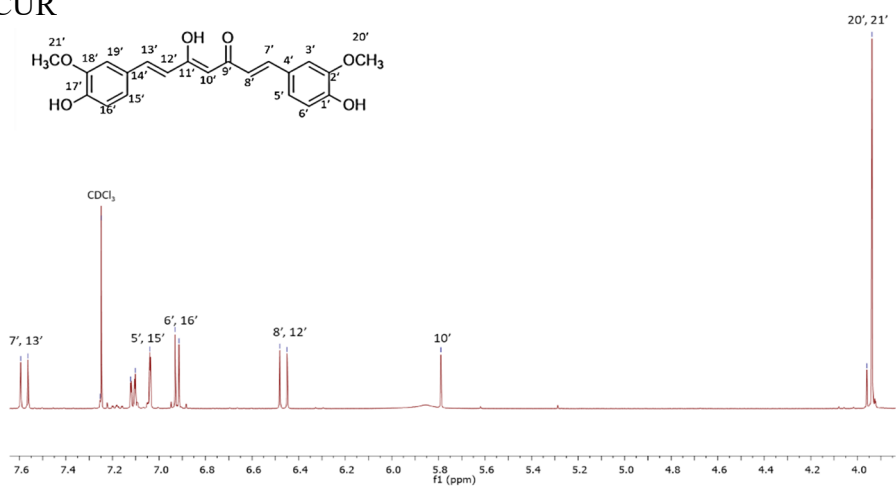

**Figure S2.** <sup>1</sup>H-NMR spectrum of MPA, CUR and MPA-CUR conjugate.

## MPA

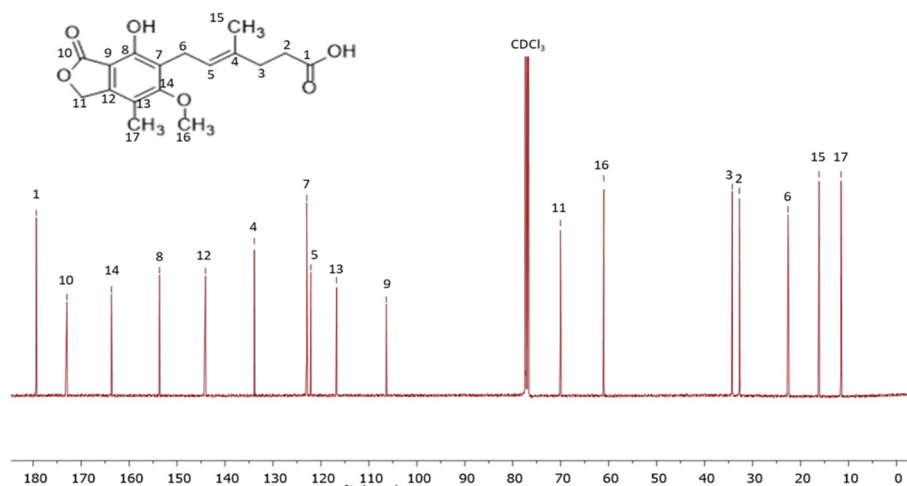

## CUR

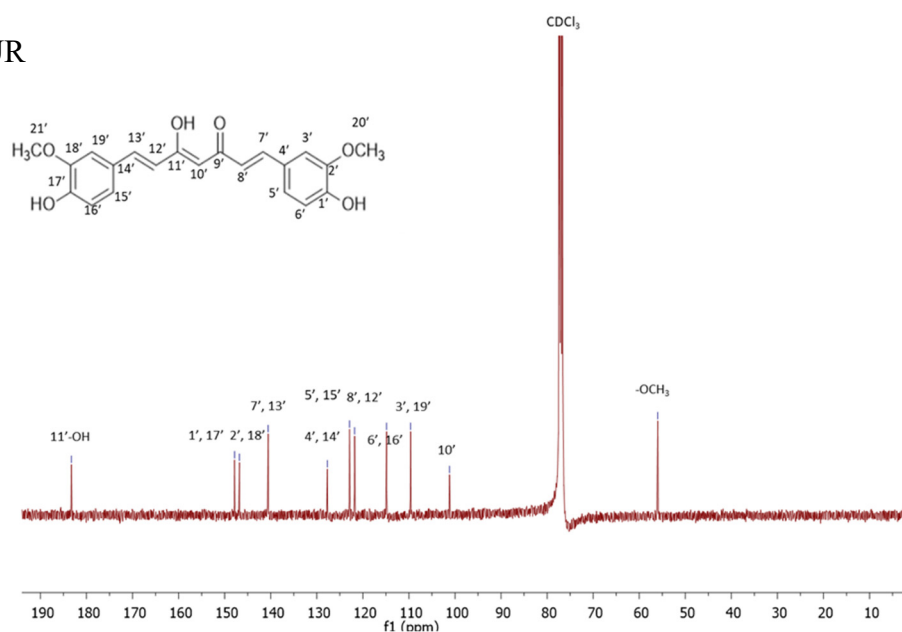

## MPA-CUR

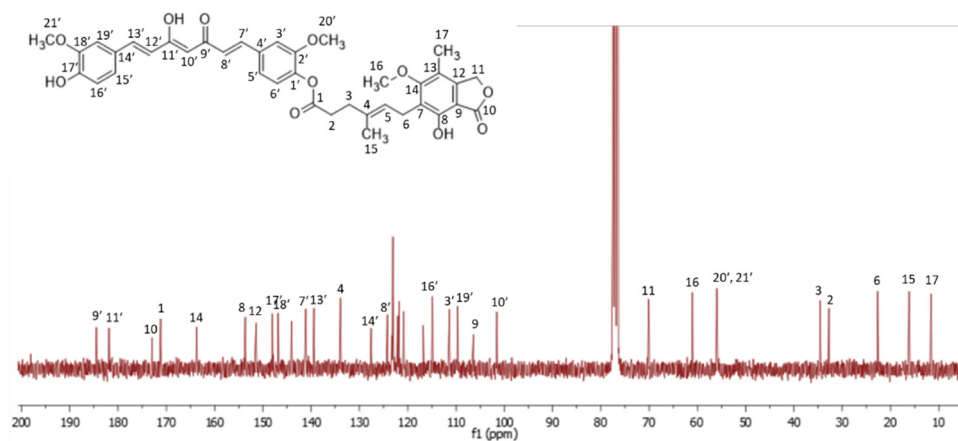

**Figure S3.** <sup>13</sup>C-NMR spectrum of MPA, CUR and MPA-CUR conjugate.

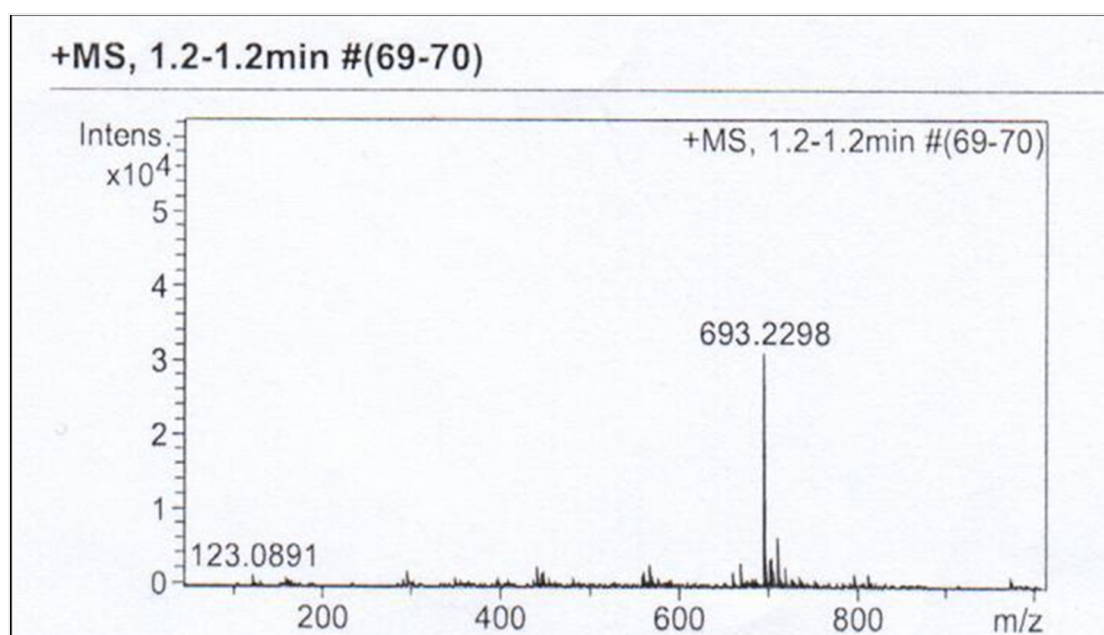

**Figure S4.** MS spectrum of MPA-CUR.
